1 **Predominant activation of 11-oxygenated androgens by peripheral blood mononuclear cells**

2 Lina Schiffer<sup>1</sup>, Alicia Bossey<sup>1</sup>, Angela E Taylor<sup>1</sup>, Ildem Akerman<sup>1</sup>, Dagmar Scheel-Toellner<sup>2</sup>, Karl-Heinz  
3 Storbeck<sup>1,3</sup>, Wiebke Arlt<sup>1,4</sup>

4 <sup>1</sup> Institute of Metabolism and Systems Research, University of Birmingham, Birmingham, UK

5 <sup>2</sup> Institute of Inflammation and Ageing, University of Birmingham, Birmingham, UK

6 <sup>3</sup> Department of Biochemistry, Stellenbosch University, Stellenbosch, South Africa

7 <sup>4</sup> National Institute for Health Research (NIHR) Birmingham Biomedical Research Centre, University  
8 Hospitals Birmingham NHS Foundation Trust and University of Birmingham, Birmingham, UK

9 **Short title:** Androgen activation in PBMCs

10 **Keywords (6 max):** aldo-keto reductase 1C3, AKR1C3, 11-oxygenated androgens, androgen metabolism,  
11 liquid chromatography-tandem mass spectrometry

12 **Corresponding author and contact for reprint requests:**

13 Professor Wiebke Arlt, Institute of Metabolism and Systems Research (IMSR), University of Birmingham,  
14 B15 2TT, Birmingham, UK

15 Email: [w.arlt@bham.ac.uk](mailto:w.arlt@bham.ac.uk)

16 **Grants or fellowships supporting the writing of the paper:**

17 This work was supported by the Wellcome Trust (Investigator Grant WT209492/Z/17/Z, to WA), the  
18 Academy of Medical Sciences UK (Newton Advanced Fellowship NAF004\1002, to KHS) and Diabetes  
19 UK (RD Lawrence Fellowship, to IA). WA receives support from the NIHR Birmingham Biomedical  
20 Research Centre at the University Hospitals Birmingham NHS Foundation Trust and the University of  
21 Birmingham (Grant Reference Number BRC-1215-20009). The views expressed are those of the authors  
22 and not necessarily those of the NIHR UK or the Department of Health and Social Care UK.

23 **Disclosures:** The authors have nothing to disclose.

24 **Abstract (250 words max)**

25 **Context:** Androgens are important modulators of immune cell function impacting proliferation,  
26 differentiation and cytokine production. The local generation of active androgens from circulating androgen  
27 precursors is an important mediator of androgen action in peripheral androgen target cells of tissue.

28 **Objective:** To characterize the activation of classic and 11-oxygenated androgens in human peripheral  
29 blood mononuclear cells (PBMCs).

30 **Methods:** PBMCs and natural killer cells were isolated from healthy male donors and incubated ex vivo  
31 with precursors and end products of the classic and 11-oxygenated androgen pathways. Steroid  
32 concentrations were quantified by liquid chromatography-tandem mass spectrometry. The expression of  
33 genes encoding steroid metabolizing enzymes was assessed by quantitative PCR.

34 **Results:** The enzyme AKR1C3 is the major reductive 17 $\beta$ -hydroxysteroid dehydrogenase in PBMCs and  
35 has higher activity for the generation of the active 11-oxygenated androgen 11-ketotestosterone than for the  
36 generation of the classic androgen testosterone from their respective precursors. Natural killer cells are the  
37 major site of AKR1C3 expression and activity within the PBMC compartment. Steroid 5 $\alpha$ -reductase type  
38 1 catalyzes the 5 $\alpha$ -reduction of classic but not 11-oxygenated androgens in PBMCs. Lag time prior to the  
39 separation of cellular components from whole blood sample increases 11KT serum concentrations in a  
40 time-dependent fashion, with significant increases detected from two hours after blood collection.

41 **Conclusions:** 11-oxygenated androgens are the preferred substrates for androgen activation by AKR1C3  
42 in PBMCs, primarily conveyed by natural killer cell AKR1C3 activity, yielding 11KT the major active  
43 androgen in PBMCs. Androgen metabolism by PBMCs can affect the levels of 11-oxygenated androgens  
44 measured in serum samples, if samples are not separated in a timely fashion.

## 45 **Introduction**

46 A critical step in androgen activation is the conversion of the androgen precursor androstenedione  
47 (A4) to the active androgen testosterone (T) (1-3), which occurs in the testes catalyzed by 17 $\beta$ -  
48 hydroxysteroid dehydrogenase type 3. However, in the majority of peripheral target tissues of androgen  
49 action, the intracrine activation of A4 to T is catalyzed by the enzyme AKR1C3 (aldo-keto reductase 1C3,  
50 also termed 17 $\beta$ -hydroxysteroid dehydrogenase type 5) (1-3), thereby representing a key regulator of local  
51 androgen exposure. Peripheral blood mononuclear cells (PBMCs) can activate A4 to T (4, 5) catalyzed by  
52 AKR1C3 (6). Androgens impact on a multitude of immune cell functions, including proliferation,  
53 differentiation, apoptosis, cytokine and immunoglobulin productions (7, 8) and also link immune and  
54 metabolic regulation (9).

55 Recent *in-vitro* work has shown that AKR1C3 has an approximately 8-fold higher catalytic  
56 efficiency for the generation of the 11-oxygenated androgen 11-ketotestosterone (11KT) from its precursor  
57 11-ketoandrostenedione (11KA4) than for the generation of T from A4 (10). 11KT activates the androgen  
58 receptor with potency and efficacy similar to T (11-13) and is the predominant circulating androgen in  
59 androgen excess conditions including congenital adrenal hyperplasia, polycystic ovary syndrome and  
60 premature adrenarche (12, 14, 15). 11KT is derived from the abundant adrenal precursor steroid 11 $\beta$ -  
61 hydroxyandrostenedione (11OHA4) (13, 16), which is converted to 11KA4 by peripheral tissue expressing  
62 11 $\beta$ -hydroxysteroid dehydrogenase type 2 (17, 18) prior to activation to 11KT by AKR1C3 (10, 16).

63 Of note, a number of studies have shown gradual increases in testosterone measured in serum, if  
64 the blood sample is left unseparated from cellular components for an increased period of time, using either  
65 immunoassays (19-21) or ultra-high performance liquid chromatography-tandem mass spectrometry (LC-  
66 MS/MS) for steroid quantification (22, 23). One of those studies additionally investigated the effect of time  
67 before separation on 11KT concentrations measured in serum and observed a much more pronounced  
68 increase in 11KT than T over time (23), which could have a differential impact on the measurement of  
69 circulating 11-oxygenated androgen concentrations.

70 In this study, we explore this further and undertake a detailed characterization of androgen  
71 activation via both classic and 11-oxygenated androgen biosynthesis pathways in the human peripheral  
72 blood cell compartment and subpopulations, utilizing PBMCs isolated from healthy volunteers.

## 73 **Material and Methods**

### 74 **Blood collection**

75 The collection of blood for PBMC isolation and serum steroid analysis underwent ethical approval  
76 by the Science, Technology, Engineering and Mathematics Ethical Review Committee of the University of  
77 Birmingham (ERN\_17-0494, ERN\_17-0494A, and ERN\_14-0446) and all participants gave informed,  
78 written consent prior to study participation. Exclusion criteria for participation were any acute or chronic  
79 disease affecting steroid biosynthesis or metabolism and intake of any medication known to interfere with  
80 steroid biosynthesis or metabolism. All blood samples were collected between 09:00h and 11:00h; 50 mL  
81 of blood were collected into K<sub>2</sub> EDTA Vacutainers™ (purple top) for the immediate isolation of PBMCs.  
82 To assess the effect of the time period between blood collection and separation of the cellular components  
83 by centrifugation on measured serum steroid concentrations, blood was collected into several SST™  
84 Vacutainers™ (gold top). The tubes were left unseparated at room temperature in an air-conditioned room  
85 and were separated by centrifugation (2000g, 10 min) after defined time periods (0, 1, 2, 4, 6 and 24 hours).  
86 The separated serum was stored at -80 °C.

### 87 **Ex vivo steroid metabolism assays in peripheral blood mononuclear cells**

88 PBMCs were isolated from blood by density gradient centrifugation using Ficoll Paque Plus (GE  
89 Healthcare) following the manufacturer's instructions. Isolated PBMCs were washed in RPMI-1640  
90 (Sigma-Aldrich) supplemented with 100 U/mL penicillin and 0.1 mg/mL streptomycin, counted and  
91 assessed for viability by trypan blue exclusion. A minimum of  $3 \times 10^6$  cells was frozen in 400  $\mu$ L Trireagent  
92 (Sigma Aldrich) and stored at -80 °C for RNA analysis at a later date. For steroid metabolism assays,  $3 \times 10^6$   
93 cells were incubated with 100 nM of the respective steroid in a final volume of 500  $\mu$ L RPMI-1640  
94 supplemented with penicillin and streptomycin. Steroids were added from stock solutions in methanol and

95 the final methanol concentration in the samples was 0.00304% (v/v). Technical replicates were prepared, if  
96 sufficient cell numbers were available. During the incubation, the samples were constantly gently rotated  
97 at 37 °C for 24 hours. For each experiment, incubations of cells with methanol only and cell-free incubations  
98 for all steroids were prepared as controls as well as dilutions of each steroid at 100 nM in medium that were  
99 frozen at -20 °C immediately after preparation. At the end of the incubation period samples centrifuged for  
100 2 minutes at 10,000 rpm. The supernatant was stored at -20 °C for steroid analysis. The cell pellet was  
101 washed in PBS, suspended in 50 µL lysis buffer (50 mM Tris pH 8.0, 150 mM NaCl, 0.1% SDS, 0.5%  
102 sodium deoxycholate, 1% Triton X-100, 0.1 mM DTE, 0.1 mM PMSF, 0.1 mM EDTA) and stored at -80  
103 °C for protein quantification.

#### 104 **Natural killer cell ex vivo steroid metabolism assays**

105 PBMCs were prepared as described above and NK cells were subsequently enriched using the  
106 MACS human NK cell isolation kit (Miltenyi Biotec) as per the manufacturer's instructions. Cells were  
107 checked for viability, counted and steroid conversion assays were set up as described above.

#### 108 **Steroid analysis by tandem mass spectrometry**

109 The following steroids were quantified by LC-MS/MS in the medium supernatant of the PBMC  
110 incubations and serum samples as previously described (15): 11β-hydroxy-5α-androstanedione (11OH-5α-  
111 dione, 5α-androstane-11β-ol-3,17-dione), 11β-hydroxyandrostenedione (11OHA4, 4-androstene-11β-ol-  
112 3,17-dione), 11β-hydroxytestosterone (11OHT, 4-androstene-11β,17β-diol-3-one), 11-ketoandrosterone  
113 (11KA4, 4-androstene-3,11,17-trione), 11-ketotestosterone (11KT, 4-androstene-17β-diol-3,11-dione), 5α-  
114 dihydrotestosterone (DHT, 5α-androstane-17β-ol-3-one), 5α-androstanediol (Adiol, 5α-androstane-3α,17β-  
115 diol), 5α-androstanedione (5α-dione, 5α-androstane-3,17-dione), androstenedione (A4, 4-androstene-3,17-  
116 dione), androsterone (An, 5α-androstane-3α-ol-17-one), dehydroepiandrosterone (DHEA, 5-androstene-  
117 3β-ol-17-one), testosterone (T, 4-androstene-17β-ol-3-one). In addition, 11-keto-5α-dihydrotestosterone  
118 (11KDHT, 5α-androstane-17β-ol-3,11-dione) and 11-keto-5α-androstanedione (11K-5α-dione, 5α-  
119 androstane-3,11,17-dione) were analyzed by ultra-high performance supercritical fluid chromatography-

120 tandem mass spectrometry (UHPSFC-MS/MS) as previously described (24). For *ex-vivo* cell incubations,  
121 steroid concentrations or their ratios were normalized to the total protein content of the incubations as  
122 determined in the supernatant after cell lysis using the DC Protein Assay (Bio-Rad).

### 123 **RNA extraction and semi-quantitative PCR**

124 Samples stored in TRI reagent were defrosted and the RNA in the aqueous phase of the phenol-  
125 chloroform extraction was purified using the RNeasy Mini Kit (Qiagen). RNA concentrations were  
126 determined from the absorbance of the sample at 260 nm using a Nanodrop spectrophotometer and reverse  
127 transcription was performed using Applied Biosystems™ TaqMan™ Reverse Transcription Reagents  
128 following the manufacturer's protocol. Quantitative PCR was performed on an ABI 7900HT sequence  
129 detection system (Perkin Elmer, Applied Biosystems) using TaqMan™ Gene Expression Assays (FAM-  
130 labelled) and the SensiFAST™ Probe Hi-ROX kit (Bioline).  $\Delta$ Ct was calculated as Ct [Target]-Geometric  
131 mean (Ct [HPRT1], Ct [GAPDH]). Gene expression in arbitrary units (A.U.) was calculated as  $1000 \cdot 2^{-\Delta$   
132  $\Delta$ Ct. For targets not reproducibly detected in duplicate reactions, relative gene expression is shown as 0.

### 133 **Analysis of published RNAseq data from PBMC subpopulations**

134 We accessed dice-database.org (25) to investigate *AKRIC3* expression determined by RNAseq in  
135 FACS-sorted PBMC subpopulations. The database contains expression data from 54 male and 37 female  
136 healthy donors (age range 18-61 years). *AKRIC3* expression data in transcript per million (TPM) were  
137 downloaded and plotted in GraphPad Prism.

### 138 **Statistical analysis**

139 Changes in serum steroid concentrations were analyzed in GraphPad Prism 8 using ANOVA  
140 followed by a Dunnett multiple comparison test to compare each timepoint against the sample processed  
141 immediately after collection (0h). Statistical analysis of differences in steroid concentrations in the  
142 supernatants from the PBMC *ex-vivo* incubations was performed by Wilcoxon matched-pairs signed rank  
143 test. Statistical analysis of RNAseq was performed by one-way ANOVA followed by Tukey's multiple  
144 comparisons test.

## 145 **Results**

### 146 **Androgen activation in PBMCs is primarily catalyzed by AKR1C3 and SRD5A1**

147 Using qPCR, we identified AKR1C3 as the major reductive, activating 17 $\beta$ -hydroxysteroid  
148 dehydrogenase isoform in PBMCs, while HSD17B3, generally considered a testes-specific isoform, was  
149 expressed at very low levels only (**Fig. 1A**). While we could not detect expression of steroid 5 $\alpha$ -reductase  
150 type 2 (SRD5A2) and 17 $\beta$ -hydroxysteroid dehydrogenase type 2 (HSD17B2) in any of the samples from  
151 14 donors using our qPCR assay, we detected consistently high expression of steroid 5 $\alpha$ -reductase type 1  
152 (SRD5A1) in samples from all donors (n=14) and detected 17 $\beta$ -hydroxysteroid dehydrogenase type 4  
153 (HSD17B4) expression in samples from 6 of 14 donors. This indicates that SRD5A1 is responsible for the  
154 5 $\alpha$ -reduction we observe in our PBMC incubations with androgen substrates while HSD17B4 catalyzes the  
155 oxidative, inactivating 17 $\beta$ -hydroxysteroid dehydrogenase activity we observed (**Fig. 1A**), consistent with  
156 previously published findings (6). HSD11B1 expression was detectable in samples from 13/14 donors,  
157 while HSD11B2 mRNA was not detected. **Fig. 1B** schematically illustrates the enzymes identified by qPCR  
158 as in PBMCs and their roles in androgen activation and inactivation in the classic and 11-oxygenated  
159 androgen biosynthesis pathways.

### 160 **PBMCs preferentially activate 11-oxygenated androgens**

161 In order to unravel the pathways of androgen metabolism in PBMCs, we isolated PBMCs from  
162 male healthy donors and performed ex vivo incubations, using as substrates several androgen precursors  
163 and active androgens from both the classic (DHEA, A4 and T) and 11-oxygenated androgen pathways  
164 (11OHA4, 11OHT, 11KA4, 11KT). Product formation was quantified by LC-MS/MS.

165 Initial time course experiments with PBMCs isolated from three male donors (aged 22, 23 and 28  
166 years) identified 24 hours as a suitable incubation time allowing for robust product quantification within  
167 the linear range of product formation over time (data not shown). These initial experiments additionally  
168 revealed very low 3 $\beta$ -hydroxysteroid dehydrogenase activity in PBMCs and thus excluded DHEA as a  
169 relevant substrate for metabolism in PBMCs (data not shown).

170 All further experiments were performed with PBMCs isolated from men aged 18-30 years (n=4-5;  
171 age 22-30 years; BMI 20.2-29.1 kg/m<sup>2</sup>) and men aged >50 years (n=4-7; age 53-72 years; BMI 21.2-30.4).  
172 Since we did not observe any significant differences in androgen metabolism and expression of genes  
173 encoding key androgen-metabolizing enzymes between the two age groups, we present and discuss the  
174 combined data for the entire cohort below (n=8-12; age 22-72; BMI 20.2-30.4 kg/m<sup>2</sup>).

175 Incubations with A4 and T yielded their respective 5 $\alpha$ -reduced products, 5 $\alpha$ -androstanedione (5 $\alpha$ -  
176 dione) and 5 $\alpha$ -dihydrotestosterone (DHT), and revealed efficient interconversion of A4 and T by reductive  
177 and oxidative 17 $\beta$ -hydroxysteroid dehydrogenases (**Fig. 2A+B**). 5 $\alpha$ -dione and DHT were further converted  
178 to their 3 $\alpha$ -hydroxy metabolites androsterone (An) and 5 $\alpha$ -androstane-3 $\alpha$ -diol (Adiol).

179 The quantitatively dominant formation observed among all substrates tested was the generation of  
180 11KT from 11KA4, which was significantly higher than the generation of T from A4 (p=0.001; n=11; **Fig.**  
181 **2C**). After an incubation period of 24 hours, PBMCs generated approximately 8 times more 11KT than T  
182 from their respective precursors 11KA4 and A4 (**Fig. 2A+C**). However, while T was converted back to A4  
183 in large quantities, incubation with 11KT led to only minor generation of 11KA4 (quantifiable in 8/12  
184 incubations, **Fig. 2D**), further contributing to preferential 11KT activation by the PBMCs.

185 Expressing the observed steady state between activation and inactivation as product/substrate ratios  
186 made this difference even more obvious, clearly indicating that the generation of active 11-oxygenated  
187 androgens is favored in PBMCs. Product/substrate-ratios for different substrates of 5 $\alpha$ -reductase reflect the  
188 established substrate preference for SRD5A1 with A4 resulting in the highest activity followed by T and  
189 with only minor activity for 11OHA4 (**Fig. 3B**).

190 The generation of 11OHA4 from 11KA4 (quantifiable in 8/12 incubations) and of 11OHT from  
191 11KT (quantifiable in 4/12 incubations) indicated 11 $\beta$ -hydroxysteroid dehydrogenase type 1 (HSD11B1)  
192 activity in PBMCs, however, at negligible levels compared to the 17 $\beta$ -hydroxysteroid dehydrogenase and  
193 5 $\alpha$ -reductase activities observed (**Fig. 2C+D**). We did not detect any 5 $\alpha$ -reduced products of 11KA4 and  
194 11KT (11-keto-5 $\alpha$ -androstanedione and 11-keto-5 $\alpha$ -dihydrotestosterone) (n=3; data not shown).



195 Incubation with the 11-oxygenated androgen precursors 11OHA4 and 11OHT led to only  
196 negligible product formation compared to the other substrates tested. After 24 hours the generation of the  
197 5 $\alpha$ -reduced product 11 $\beta$ -hydroxy-5 $\alpha$ -androstanedione (11OH-5 $\alpha$ -dione) from 11OHA4 could be  
198 quantified, as well as the generation of 11KT from 11OHT (**Fig. 1E+F**).

### 199 **AKR1C3 expression and activity in PBMCs is primarily driven by natural killer cells**

200 In order to identify the subpopulation(s) within the PBMC compartment that are responsible for the  
201 AKR1C3-catalysed androgen activation observed in our PBMC incubations, we used publicly available  
202 RNAseq-based gene expression data from 15 FACS-sorted PBMCs subpopulations including B-cells,  
203 different T-cell populations, monocytes and natural killer (NK) cells (dice-database.org (25)). This revealed  
204 significantly higher AKR1C3 expression in NK cells ( $p < 0.0001$ ) than in any other PBMC subpopulation  
205 (**Fig. 4A**). There was no difference between AKR1C3 expression in NK cells from male and female donors  
206 (**Fig. 4B**). To confirm NK cells as the major site of AKR1C3 activity, we isolated PBMCs from a leukocyte  
207 cone of an anonymous donor and subsequently enriched NK cells in a fraction of the PBMCs. Ex vivo  
208 incubations of the matched crude PBMC isolations and the enriched NK cell fraction with the AKR1C3  
209 substrates A4 and 11KA4 confirmed higher AKR1C3 activity in the NK cell enriched incubation compared  
210 to the incubation with crude PBMC isolates (**Fig. 4C**).

### 211 **Lag time prior to the separation of cellular components increases 11-ketotestosterone**

212 We collected blood samples from six healthy volunteers (3m, 3 f; age range 28-50 years) to assess  
213 the effect of an extended incubation of their blood samples unseparated from cellular components on the  
214 quantification of serum steroids by LC-MS/MS (**Fig. 5**). We observed a time-dependent increase in the  
215 serum concentrations of the AKR1C3 product 11KT, reaching a median relative increase of 44% after 24  
216 hours, with significant increases in 11KT observed after 2 hours of leaving the full blood samples  
217 unseparated (**Fig. 5I**). Additionally, we observed decreases in the concentrations of the AKR1C3 substrates  
218 A4 and 11KA4, with median relative decreases of 19% and 34%, respectively, at 24 hours. The observed

219 decreases in serum A4 concentrations were statistically significant for the majority of time points assessed  
220 ( $p < 0.05$ ), while statistical significance was not reached for the decrease in 11KA4 (**Fig. 5C+H**).

221         Among the other analytes investigated (DHEA, T, DHT, An, 11OHA4), only 11OHA4 exhibited  
222 significant changes over time ( $p < 0.05$ ), with a median relative decrease of 38% occurring within one hour  
223 after blood collection (**Fig. 5G**).

## 224 **Discussion**

225         Androgen signaling is vital for immune cell function by regulating proliferation, differentiation,  
226 cytokine production and other pathways (7, 8). Intracrine androgen activation from adrenal androgen  
227 precursors contributes a large proportion of androgen receptor activation in peripheral target cells and  
228 tissues of androgen action (17, 26). While we have previously shown that PBMCs can activate the classic  
229 androgen precursor A4 to T via AKR1C3 and further convert T to the most potent human androgen DHT  
230 (6), we show for the first time in this study that PBMCs preferentially activate the 11-oxygenated androgen  
231 precursor 11KA4 to its active counterpart 11KT. We show that PBMCs generate approximately 8-fold more  
232 11KT than T from their respective precursors, revealing 11KT as the predominant active androgen within  
233 the human PBMC compartment. Using in vitro systems overexpressing AKR1C3, Barnard et al. (10)  
234 previously demonstrated that AKR1C3 has a significantly higher catalytic efficiency for the activation of  
235 11-oxygenated androgens compared to classic androgens, which we have shown here, for the first time, ex  
236 vivo in human cells.

237         In addition, we show that the inactivating conversion of the active androgens T and 11KT to their  
238 respective precursors A4 and 11KA4 by oxidative 17 $\beta$ -hydroxysteroid dehydrogenase activity is relevant  
239 only for T, while inactivation of 11KT to 11KA4 occurs only in negligible amounts. Taken together, this  
240 demonstrates that PBMCs preferentially activate 11-oxygenated androgens. This is in agreement with the  
241 study by Barnard et al. (10) who showed that while 17 $\beta$ -hydroxysteroid dehydrogenase type 2 (HSD17B2)  
242 catalyzes the inactivation of T and 11KT with similar efficiencies, increased ratios of AKR1C3 to

243 HSD17B2 favor the activation of 11-oxygenated androgens due to the catalytic preference of AKR1C3 for  
244 11KA4 over A4.

245 Our results confirm previous findings that steroid  $5\alpha$ -reduction contributes to the activation of  
246 classic androgens in PBMCs by generating the most potent human androgen DHT from T (6). The observed  
247 substrate preference of  $5\alpha$ -reduction for A4 over T is consistent with the established substrate preference  
248 of steroid  $5\alpha$ -reductase type 1 (SRD5A1) (27), which is the major steroid  $5\alpha$ -reductase in PBMCs (6). We  
249 did not observe relevant  $5\alpha$ -reduction of 11-oxygenated androgens. Using in vitro promoter reporter assays  
250 11KDHT has been shown to activate the AR with potency and efficacy comparable to DHT. However it is  
251 not clear if the generation of 11KDHT by the  $5\alpha$ -reduction of 11KT is relevant under physiological  
252 conditions. Recently we showed that 11KT metabolism primarily proceeds via the AKR1D1 mediated  $5\beta$ -  
253 reduction of the steroid A-ring and that SRD5A2, but not SRD5A1 can efficiently catalyze the  $5\alpha$ -reduction  
254 of 11KT (28). We now confirm that 11KT is not  $5\alpha$ -reduced by human cells with SRD5A1 expressed at  
255 levels that efficiently convert T to DHT, confirming that the  $5\alpha$ -reduction of 11KT would require the  
256 expression of SRD5A2.

257 In this study, we did not observe any significant effect of age on androgen activation in PBMCs  
258 with only a trend for increased median AKR1C3 and SRD5A1 activity in contrast to a published study by  
259 our group that described significantly increased AKR1C3 and SRD5A1 activity in men aged over 50  
260 compared to men aged 18-30 years (6). The small sample numbers of both studies and differences in the  
261 assays used for steroid quantification (LC-MS/MS in our assay vs. thin layer chromatography) are likely to  
262 have caused the discrepancy. However, when assessing the effect of age on androgen activation in  
263 peripheral tissues, age-related changes in the supply of androgen precursors from circulation need to be  
264 considered, in addition to age-dependent changes in the expression of androgen-activating and -inactivating  
265 enzymes in the peripheral target tissues of androgen action. While circulating levels of classic androgens  
266 significantly decline with age, levels of 11-oxygenated androgens remain constant across adulthood (29,  
267 30). Hence, the peripheral activation of 11-oxygenated androgens is favored over the activation of classic

268 androgens not only by the substrate preference of the key androgen activating enzyme AKR1C3, but also  
269 by constant high substrate availability across the life span.

270 Primary adrenal insufficiency is associated with an increased risk of infections compared to the  
271 general population (31). In addition, patients with primary adrenal insufficiency show significantly reduced  
272 NK cell cytotoxicity (32). Interestingly, this finding not affected by DHEA replacement therapy, excluding  
273 the deficiency of the classic androgen pathway precursor DHEA as a cause of the reduced NK cell  
274 cytotoxicity. Our study identifies adrenal 11-oxygenated androgen precursors rather than classic androgen  
275 precursors as predominant androgens activated in the PBMC compartment and particularly in NK cells,  
276 potentially linking the lack of adrenal 11-oxygenated androgen precursors in primary adrenal insufficiency  
277 to the observed decrease in NK cell cytotoxicity.

278 The preference of PBMCs to generate 11KT from 11KA4 via AKR1C3 activity is further reflected  
279 in the significant increases in 11KT serum concentrations, if cellular components were not removed from  
280 the full blood samples in a timely fashion, confirming previous preliminary observations (23). We found  
281 that these changes became significant after two hours, suggesting that blood samples for the measurement  
282 of 11-oxygenated androgens should be processed within two hours of collection. 11KT is the dominant  
283 circulating active androgen in polycystic ovary syndrome (15) and CAH (14, 33) and a useful marker for  
284 the diagnosis of androgen excess. The limited stability of 11KT levels in unseparated full blood samples  
285 suggests that saliva, a cell-free biofluid, could be a superior matrix for the measurement 11KT (33, 34).

286 In conclusion, we show that 11-oxygenated androgen precursors are the preferred substrates for  
287 androgen activation by AKR1C3 in PBMCs, yielding 11KT as the major active androgen in the PBMC  
288 compartment. Importantly, AKR1C3 is predominantly expressed in NK cells, potentially linking adrenal  
289 11-oxygenated androgen deficiency to the reduced NK cell cytotoxicity in primary adrenal insufficiency.  
290 Androgen metabolism by PBMCs can affect the concentrations of 11-ketotestosterone measured in serum  
291 samples, if samples are not processed in a timely, standardized way.

292 **Acknowledgments**

293           We thank all volunteers for the donation of blood samples. We would like to thank Professors  
294 Martin Hewison and Karim Raza, University of Birmingham, for their help with obtaining ethical approval  
295 for blood cone collections. We are grateful to Emily Powell, University of Birmingham, for her help with  
296 the PBMC and NK cell isolation.

## 297 **References**

- 298 1. Penning TM, Burczynski ME, Jez JM, Hung CF, Lin HK, Ma H, et al. Human 3alpha-  
299 hydroxysteroid dehydrogenase isoforms (AKR1C1-AKR1C4) of the aldo-keto reductase superfamily:  
300 functional plasticity and tissue distribution reveals roles in the inactivation and formation of male and  
301 female sex hormones. *Biochem J.* 2000;351(Pt 1):67-77.
- 302 2. Penning TM, Wangtrakuldee P, Auchus RJ. Structural and Functional Biology of Aldo-Keto  
303 Reductase Steroid-Transforming Enzymes. *Endocrine Rev* 2019;40(2):447-75.
- 304 3. Schiffer L, Arlt W, Storbeck KH. Intracrine androgen biosynthesis, metabolism and action  
305 revisited. *Mol Cell Endocrinol.* 2018;465:4-26.
- 306 4. Zhou Z, Shackleton CH, Pahwa S, White PC, Speiser PW. Prominent sex steroid metabolism in  
307 human lymphocytes. *Mol Cell Endocrinol.* 1998;138(1-2):61-9.
- 308 5. Milewich L, Kaimal V, Toews GB. Androstenedione metabolism in human alveolar macrophages.  
309 *The Journal of clinical endocrinology and metabolism.* 1983;56(5):920-4.
- 310 6. Hammer F, Drescher DG, Schneider SB, Quinkler M, Stewart PM, Allolio B, et al. Sex steroid  
311 metabolism in human peripheral blood mononuclear cells changes with aging. *J Clin Endocrinol Metab.*  
312 2005;90(11):6283-9.
- 313 7. Trigunaite A, Dimo J, Jorgensen TN. Suppressive effects of androgens on the immune system. *Cell*  
314 *Immunol.* 2015;294(2):87-94.
- 315 8. Gilliver SC. Sex steroids as inflammatory regulators. *J Steroid Biochem Mol Biol.* 2010;120(2-  
316 3):105-15.
- 317 9. Rubinow KB. An intracrine view of sex steroids, immunity, and metabolic regulation. *Mol Metab.*  
318 2018;15:92-103.
- 319 10. Barnard M, Quanson JL, Mostaghel E, Pretorius E, Snoep JL, Storbeck KH. 11-Oxygenated  
320 androgen precursors are the preferred substrates for aldo-keto reductase 1C3 (AKR1C3): Implications for  
321 castration resistant prostate cancer. *J Steroid Biochem Mol Biol.* 2018;183:192-201.
- 322 11. Pretorius E, Africander DJ, Vlok M, Perkins MS, Quanson J, Storbeck KH. 11-Ketotestosterone  
323 and 11-Ketodihydrotestosterone in Castration Resistant Prostate Cancer: Potent Androgens Which Can No  
324 Longer Be Ignored. *PloS One.* 2016;11(7):e0159867.
- 325 12. Rege J, Turcu AF, Kasa-Vubu JZ, Lerario AM, Auchus GC, Auchus RJ, et al. 11-Ketotestosterone  
326 Is the Dominant Circulating Bioactive Androgen During Normal and Premature Adrenarche. *J Clin*  
327 *Endocrinol Metab.* 2018;103(12):4589-98.
- 328 13. Rege J, Nakamura Y, Satoh F, Morimoto R, Kennedy MR, Layman LC, et al. Liquid  
329 chromatography-tandem mass spectrometry analysis of human adrenal vein 19-carbon steroids before and  
330 after ACTH stimulation. *J Clin Endocrinol Metab.* 2013;98(3):1182-8.

- 331 14. Turcu AF, Nanba AT, Chomic R, Upadhyay SK, Giordano TJ, Shields JJ, et al. Adrenal-derived  
332 11-oxygenated 19-carbon steroids are the dominant androgens in classic 21-hydroxylase deficiency. *Eur J*  
333 *Endocrinol*. 2016;174(5):601-9.
- 334 15. O'Reilly MW, Kempegowda P, Jenkinson C, Taylor AE, Quanson JL, Storbeck KH, et al. 11-  
335 Oxygenated C19 Steroids Are the Predominant Androgens in Polycystic Ovary Syndrome. *J Clin*  
336 *Endocrinol Metab*. 2017;102(3):840-8.
- 337 16. Storbeck KH, Bloem LM, Africander D, Schloms L, Swart P, Swart AC. 11beta-  
338 Hydroxydihydrotestosterone and 11-ketodihydrotestosterone, novel C19 steroids with androgenic activity:  
339 a putative role in castration resistant prostate cancer? *Mol Cell Endocrinol*. 2013;377(1-2):135-46.
- 340 17. Schiffer L, Barnard L, Baranowski ES, Gilligan LC, Taylor AE, Arlt W, et al. Human steroid  
341 biosynthesis, metabolism and excretion are differentially reflected by serum and urine steroid metabolomes:  
342 A comprehensive review. *J Steroid Biochem Mol Biol*. 2019;194:105439.
- 343 18. Turcu AF, Rege J, Auchus RJ, Rainey WE. 11-Oxygenated androgens in health and disease. *Nat*  
344 *Rev Endocrinol*. 2020;16(5):284-96.
- 345 19. Hammer EJ, Astley JP. Increase in serum testosterone following contact with blood cells. *Ann Clin*  
346 *Biochem*. 1985;22 ( Pt 5):539-40.
- 347 20. Jones ME, Folkerd EJ, Doody DA, Iqbal J, Dowsett M, Ashworth A, et al. Effect of delays in  
348 processing blood samples on measured endogenous plasma sex hormone levels in women. *Cancer*  
349 *epidemiology, biomarkers & prevention : a publication of the American Association for Cancer Research,*  
350 *cosponsored by the American Society of Preventive Oncology*. 2007;16(6):1136-9.
- 351 21. Zhang DJ, Elswick RK, Miller WG, Bailey JL. Effect of serum-clot contact time on clinical  
352 chemistry laboratory results. *Clin Chem* 1998;44(6 Pt 1):1325-33.
- 353 22. Hepburn S, Wright MJ, Boyder C, Sahertian RC, Lu B, Zhang R, et al. Sex steroid hormone stability  
354 in serum tubes with and without separator gels. *Clin Chem Lab Med*. 2016;54(9):1451-9.
- 355 23. Hawley JM, Adaway JE, Owen LJ, Keevil BG. Development of a total serum testosterone,  
356 androstenedione, 17-hydroxyprogesterone, 11beta-hydroxyandrostenedione and 11-ketotestosterone LC-  
357 MS/MS assay and its application to evaluate pre-analytical sample stability. *Clin Chem Lab Med*. 2020 Jul  
358 1:4563220937735. Online ahead of print.
- 359 24. Quanson JL, Stander MA, Pretorius E, Jenkinson C, Taylor AE, Storbeck KH. High-throughput  
360 analysis of 19 endogenous androgenic steroids by ultra-performance convergence chromatography tandem  
361 mass spectrometry. *J Chromatogr B Analyt Technol Biomed Life Sci*. 2016;1031:131-8.
- 362 25. Schmiedel BJ, Singh D, Madrigal A, Valdovino-Gonzalez AG, White BM, Zapardiel-Gonzalo J,  
363 et al. Impact of Genetic Polymorphisms on Human Immune Cell Gene Expression. *Cell*. 2018;175(6):1701-  
364 15.e16.

- 365 26. Labrie F. All sex steroids are made intracellularly in peripheral tissues by the mechanisms of  
366 intracrinology after menopause. *J Steroid Biochem Mol Biol*. 2015;145:133-8.
- 367 27. Thigpen AE, Cala KM, Russell DW. Characterization of Chinese hamster ovary cell lines  
368 expressing human steroid 5 alpha-reductase isozymes. *J Biol Chem*. 1993;268(23):17404-12.
- 369 28. Barnard L, Nikolaou N, Louw C, Schiffer L, Gibson H, Gilligan LC, et al. The A-ring reduction of  
370 11-ketotestosterone is efficiently catalysed by AKR1D1 and SRD5A2 but not SRD5A1. *J Steroid Biochem*  
371 *Mol Biol*. 2020;202:105724.
- 372 29. Davio A, Woolcock H, Nanba AT, Rege J, O'Day P, Ren J, et al. Sex Differences in 11-Oxygenated  
373 Androgen Patterns across Adulthood. *J Clin Endocrinol Metab*. 2020 Aug 1;105(8):dgaa343.
- 374 30. Nanba AT, Rege J, Ren J, Auchus RJ, Rainey WE, Turcu AF. 11-Oxygenated C19 Steroids Do  
375 Not Decline With Age in Women. *J Clin Endocrinol Metab*. 2019;104(7):2615-22.
- 376 30. Tresoldi AS, Sumilo D, Perrins M, Toulis KA, Prete A, Reddy N, Wass JAH, Arlt W. Increased  
377 infection risk in Addison's disease and congenital adrenal hyperplasia. *J Clin Endocrinol Metab*. 2020 Feb  
378 1;105(2):418-29.
- 379 32. Bancos I, Hazeldine J, Chortis V, Hampson P, Taylor AE, Lord JM, et al. Primary adrenal  
380 insufficiency is associated with impaired natural killer cell function: a potential link to increased mortality.  
381 *Eur J Endocrinol*. 2017;176(4):471-80.
- 382 33. Bacila I, Adaway J, Hawley J, Mahdi S, Krone R, Patel L, et al. Measurement of Salivary Adrenal-  
383 Specific Androgens as Biomarkers of Therapy Control in 21-Hydroxylase Deficiency. *J Clin Endocrinol*  
384 *Metab*. 2019;104(12):6417-29.
- 385 34. Schiffer L, Adaway JE, Arlt W, Keevil BG. A liquid chromatography-tandem mass spectrometry  
386 assay for the profiling of classical and 11-oxygenated androgens in saliva. *Ann Clin Biochem*.  
387 2019;56(5):564-73.

388



## 389 **Figure Legends**

390 **Fig. 1:** Expression of genes encoding key androgen-metabolizing enzymes in PBMCs isolated from healthy  
391 men (A, n=14; age range 22-72 years; BMI range 20.2-30.4 kg/m<sup>2</sup>). Gene expression was assessed by semi-  
392 quantitative PCR, normalized to HPRT1 and GAPDH and arbitrary units (A.U.) were calculated as  
393  $1000 \cdot 2^{-\Delta Ct}$ . (B) Schematic representation of the expressed steroid-metabolizing enzymes and their roles  
394 in activation and inactivation of androgens in classic and 11-oxygenated androgen pathways.

395 **Fig. 2:** Ex vivo metabolism of classic (A+B) and 11-oxygenated androgens (C-F) by PBMCs isolated from  
396 healthy men (n=8-12; age range 22-72 years; BMI range 20.2-30.4 kg/m<sup>2</sup>). PBMCs were incubated with  
397 100 nM substrate for 24 hours. The respective substrate is shown in a grey box for each graph. Product  
398 formation was quantified by LC-MS/MS and normalized to the total protein content of the incubation.  
399 Median and range are indicated. Product concentrations below the LLOQ are shown as 0.

400 **Fig. 3:** Product/substrate ratios in ex vivo incubations of PBMCs isolated from healthy men (n=8-12; age  
401 range 22-72 years; BMI range 20.2-30.4 kg/m<sup>2</sup>) after the addition of different steroid substrates. (A) Steady-  
402 state ratios of 17 $\beta$ -hydroxysteroid dehydrogenase products and substrates, reflecting the dominant  
403 contribution of the reductive, activating 17 $\beta$ -hydroxysteroid dehydrogenase AKR1C3 to 11-oxygenated  
404 androgen metabolism. (B) 5 $\alpha$ -reductase activity by SRD5A1. Product and substrate were quantified by LC-  
405 MS/MS after a 24-hour incubation. Ratios were normalized to the total protein content of the incubation.  
406 Statistical analysis was performed using Wilcoxon matched-pairs signed rank test.

407 **Fig. 4:** Natural killer cells are the major peripheral blood mononuclear cell population with *AKR1C3*  
408 expression (A and B) and activity (C). RNAseq analysis of FACS-sorted PBMC subpopulations (dice-  
409 database.org; (25)) revealed natural killer cells (NK cells) as the cell type with the highest *AKR1C3*  
410 expression (A) with comparable expression in women (n=37) and men (n=54) (B). NK cell-enriched  
411 incubations with *AKR1C3* substrates (n=4 technical replicates) showed higher *AKR1C3* activity (shown  
412 as product/substrate ratio) compared to incubations of crude PBMC preparations from the same donor (n=1)

413 (C). NK cells enriched using MACS negative selection (Miltenyi Biotec) were incubated and product  
414 formation after 24 hours analyzed by LC-MS/MS. Statistical analysis of AKR1C3 expression in the PBMC  
415 subpopulation was performed by one-way ANOVA followed by Tukey's multiple comparisons test.  
416 AKR1C3 expression in male and female NK cells was compared by Mann-Whitney test. TPM, transcripts  
417 per million.

418 **Fig. 5:** Relative changes in androgen concentrations compared to baseline, measured in serum after  
419 incubation of unseparated whole blood samples. Baseline samples were separated by centrifugation within  
420 1h after collection. The remaining samples were incubated as whole blood at room temperature for the  
421 times indicated prior to separation of serum and cellular content (sample numbers: n=6 for DHEA (**B**), n=6  
422 for A4 (**C**), n=5 for T (**D**), n=3 for DHT (**E**), n=6 for An (**F**), n=6 for 11OHA4 (**G**), 11KA4 (**H**) and 11KT  
423 (**I**)). Individual data points are shown with range and median. Statistical analysis was performed on the  
424 concentrations in nM using ANOVA, followed by Dunnett multiple comparison test to compare each time  
425 point against baseline.

Figure 1

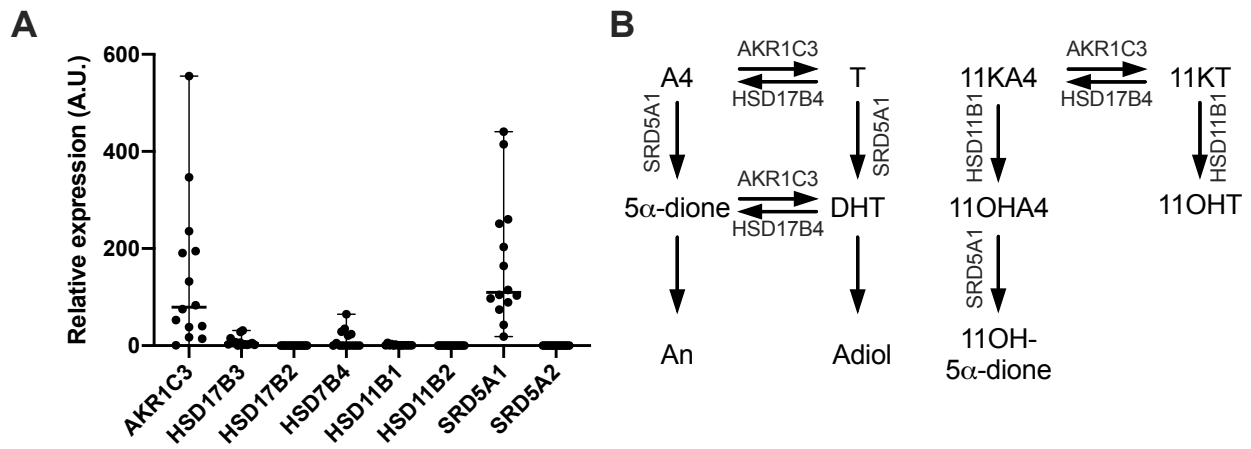

Figure 2

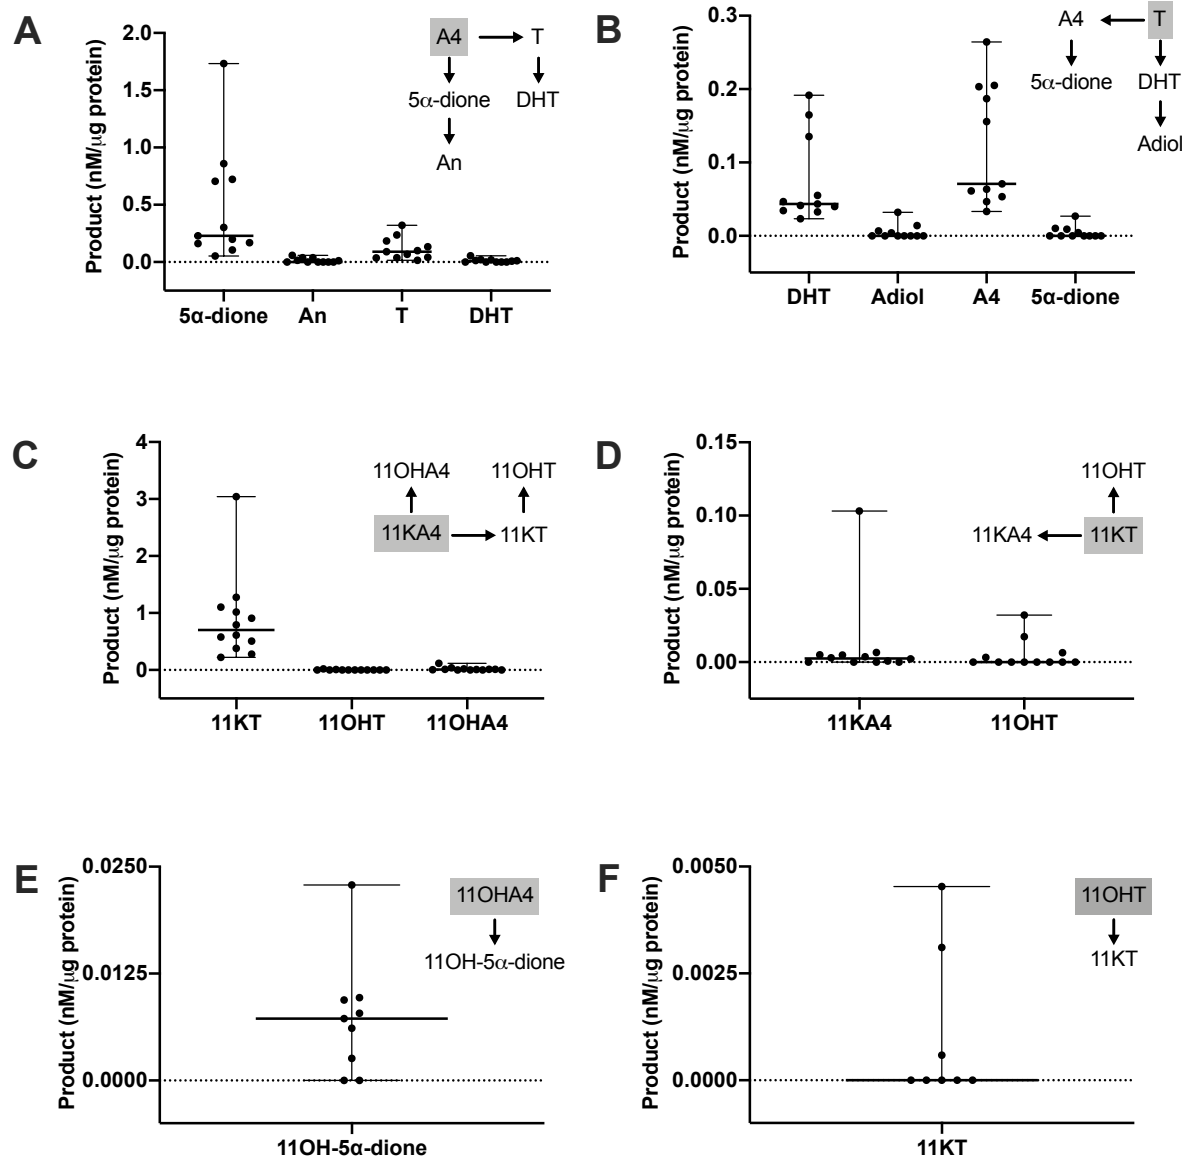

Figure 3

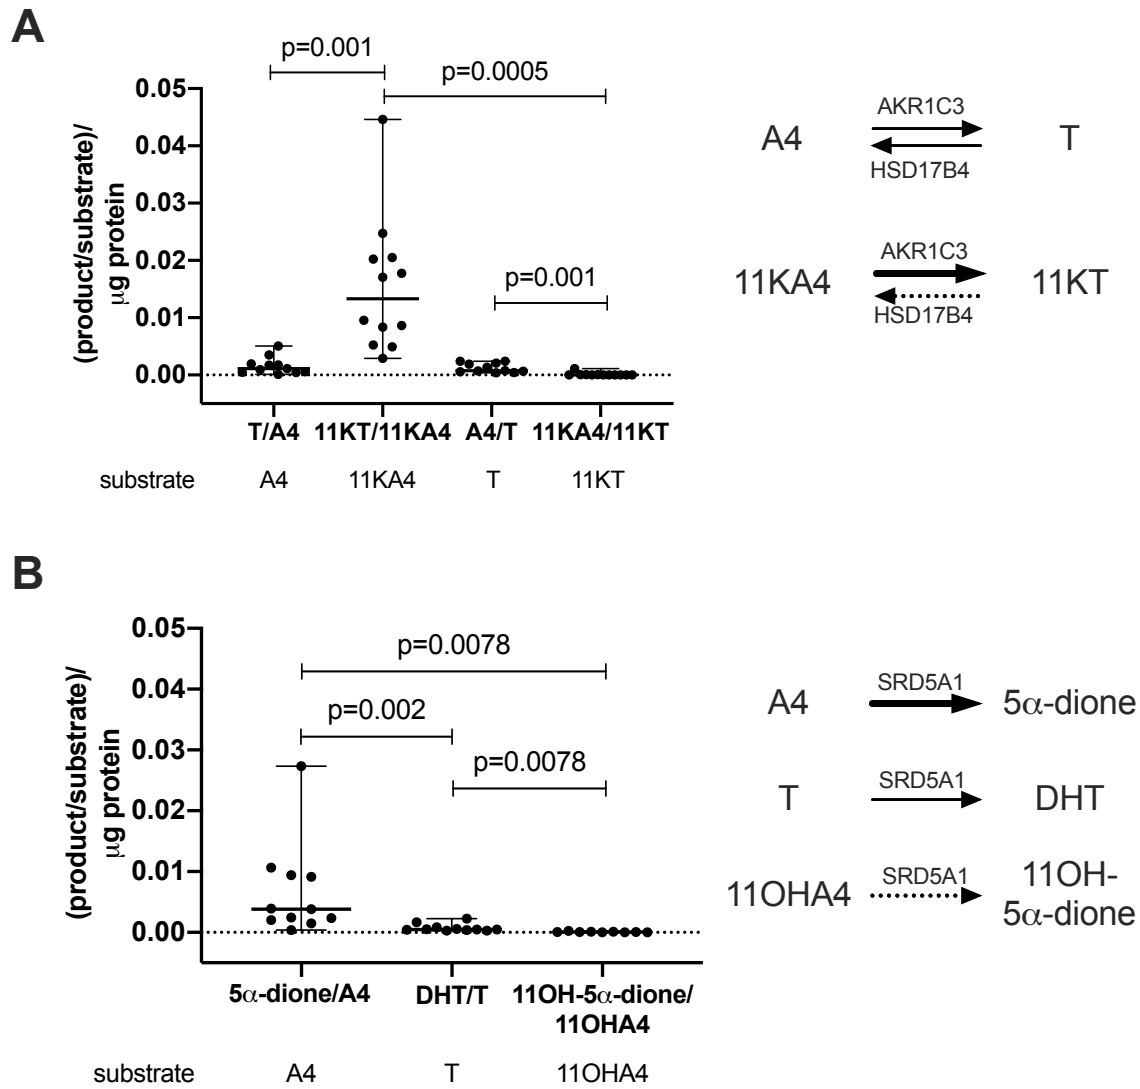

Figure 4

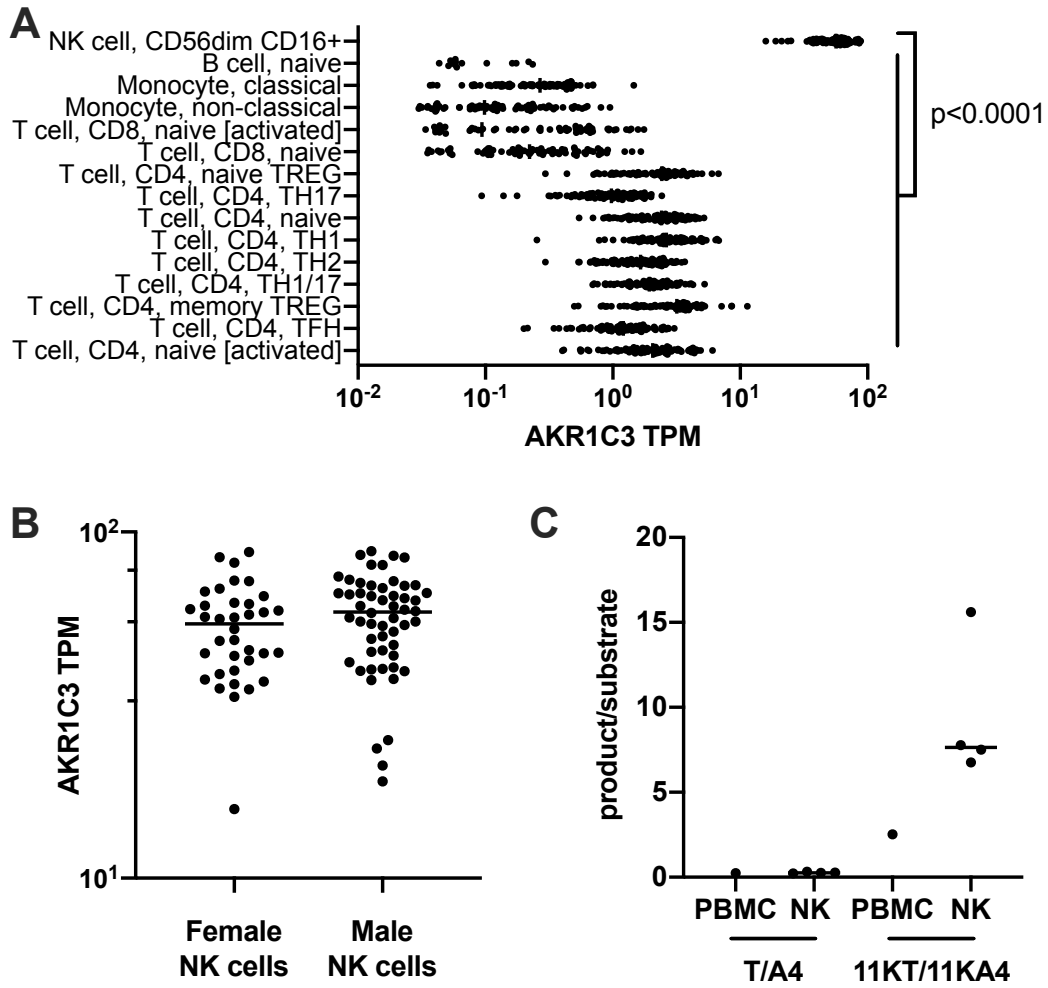

Figure 5

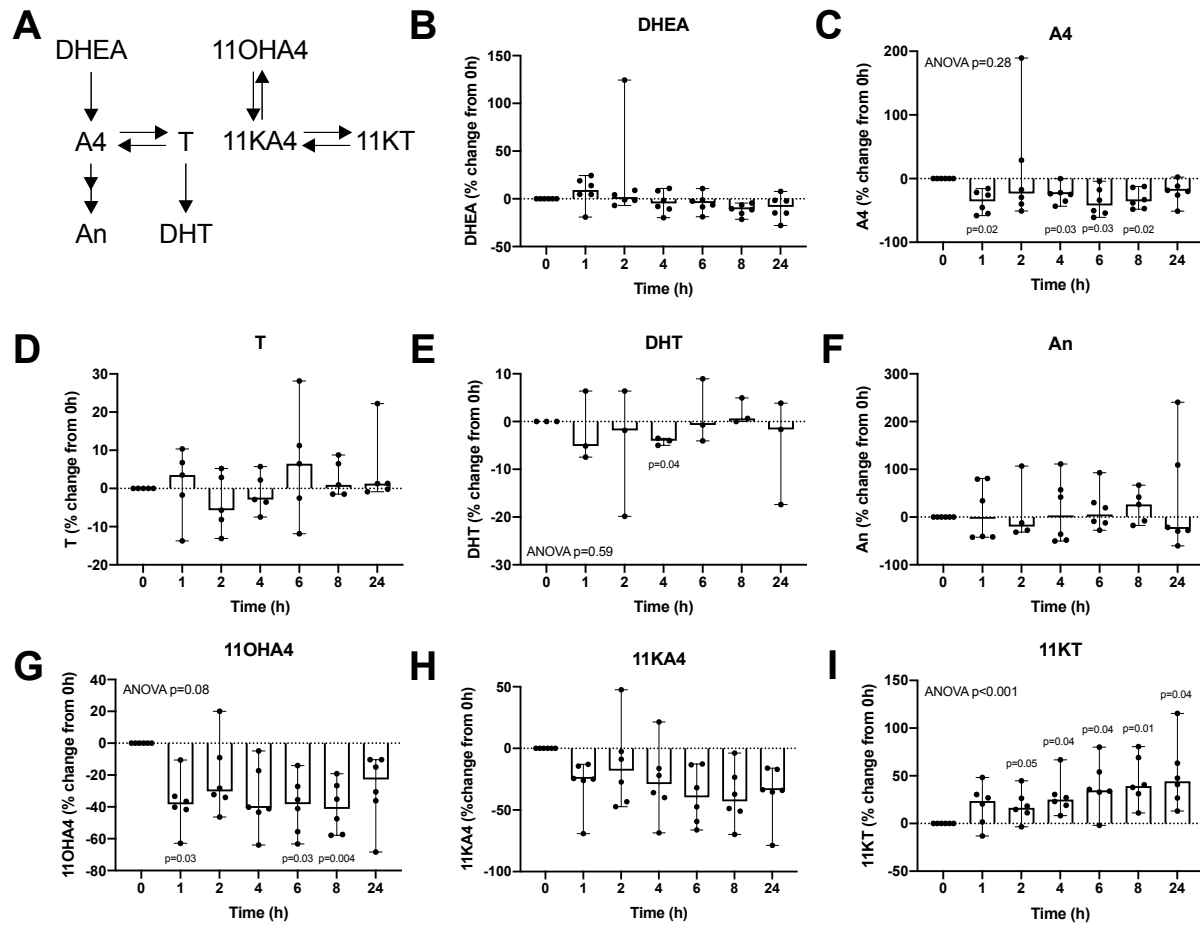

Source: https://biorxiv.org/content/10.1101/2020.09.08.288316v1.full.pdf
